# Supplementary material for: Interface-assisted phase transition in MOF-derived MoS2/CoS2 heterostructures for highly efficient dual-pH hydrogen evolution and overall water splitting
Source: Royal Society of Chemistry journal article supplement (doi:10.1039/d2ta02493d), 2022-01-01
Supplement: d2ta02493d1.pdf [file d2ta02493d1.pdf]

**Supporting Information for**  
**Interface-assisted phase transition in MOF-derived**  
**MoS<sub>2</sub>/CoS<sub>2</sub> heterostructures for highly efficient dual-pH**  
**hydrogen evolution and overall water splitting**

*Pu Chang,<sup>1</sup> Tian Wang,<sup>2</sup> Zongli Liu,<sup>1</sup> Xiaohu Wang,<sup>3</sup> Jiatong Zhang,<sup>1</sup> Hongfei Xiao,<sup>1</sup>  
Lixiu Guan,<sup>2,\*</sup> and Junguang Tao<sup>1,\*</sup>*

<sup>1</sup>*School of Materials Science and Engineering, Hebei University of Technology, Tianjin  
300132, China*

<sup>2</sup>*School of Science, Hebei University of Technology, Tianjin 300401, China*

<sup>3</sup>*Rising Graphite Applied Technology Research Institute, Chinese Graphite Industrial  
Park-Xinghe, Ulanqab, Inner Mongolia, 013650, China*

**Material Synthesis:**

*Synthesis of cobalt-based metal-organic framework (Co-MOF) nanoarrays on carbon cloth (CC):* CC was immersed in acetone, ethanol, and deionized (DI) water for ultrasonically cleaning of 30 min in each step.

Firstly, 0.55 g Co(NO<sub>3</sub>)<sub>2</sub>·6H<sub>2</sub>O and 1.30 g 2-methylimidazole (C<sub>4</sub>H<sub>6</sub>N<sub>2</sub>) were uniformly dissolved in 40 mL water. Subsequently, a piece of treated CC (2×3 cm<sup>2</sup>) was immersed in the above solution at room temperature for 5 h. Finally, the obtained purple CC after the reaction was rinsed with ethanol repeatedly and dried overnight to obtain Co-MOF/CC.

*Synthesis of CoMoO<sub>4</sub> on CC:* The prepared Co-MOF/CC was immersed into 50 mL solution (ethanol: DI water = 3:2) containing 0.91 g sodium molybdate (Na<sub>2</sub>MoO<sub>4</sub>) and kept at 100 °C for 3 h. After etching, the

samples were washed by ethanol and dried overnight to obtain CoMoO<sub>4</sub>/CC.

*Synthesis of 1T-2H MoS<sub>2</sub>/CoS<sub>2</sub> heterostructure on CC:* The 1T-2H MoS<sub>2</sub>/CoS<sub>2</sub> heterostructure was prepared by simple one-step calcination at 400 °C for 5 h under Ar atmosphere, where 1 g thiourea powder and CoMoO<sub>4</sub>/CC precursors were placed in the upstream and downstream positions in the tube furnace, respectively. For comparison, different etching time of 1 h, 3 h and 5 h were used without changing the other conditions. The mass loadings of all samples on CC are given in Table S1.

*Synthesis of CoS<sub>2</sub> on CC:* The conditions remained the same as in the preparation of CoMoO<sub>4</sub> step except for the replacement of 0.91 g sodium molybdate with 0.69 g Co(NO<sub>3</sub>)<sub>2</sub>·6H<sub>2</sub>O.

*Synthesis of MoS<sub>2</sub> on CC:* The MoS<sub>2</sub> was prepared on CC using a simple hydrothermal method. A piece of treated CC (2×3 cm<sup>2</sup>) substrate was immersed in 40 mL aqueous solution composed of 0.25 g Na<sub>2</sub>MoO<sub>4</sub> and 0.5 g TAA. Subsequently, the solution was transferred into a 50 mL Teflon-lined stainless autoclave and heated to 200° for 20 h. The prepared sample was washed with ethanol and dried at 60° to obtain the MoS<sub>2</sub> on CC.

*Preparation of Pt/C and IrO<sub>2</sub> on CC:* The commercial Pt/C (20 wt%, Aladdin) and IrO<sub>2</sub> (99%, Aladdin) was drop-casted on CC using catalyst ink. The catalyst ink was obtained by dispersing Pt/C and IrO<sub>2</sub> uniformly in a solution containing 0.5 mL ethanol and 50 μL Nafion, respectively.

The mass loading of Pt/C was calculated to be  $\sim 2.0 \text{ mg cm}^{-2}$ .

*Turnover frequency (TOF) calculations for HER and OER:*

The TOF ( $\text{s}^{-1}$ ) of HER and OER are calculated according to the following equations (1) and (2), respectively.

$$TOF = \frac{|J|S_{geo}}{2Fn} \quad (1)$$

$$TOF = \frac{|J|S_{geo}}{4Fn} \quad (2)$$

where  $J$  is the measured current density ( $\text{A cm}^{-2}$ ),  $S_{geo}$  is geometric area of the working electrode ( $1 \text{ cm}^2$ ),  $F$  is the Faraday constant ( $96485 \text{ C mol}^{-1}$ ), and  $n$  is the mole number of the active site of the electrode.<sup>1,2</sup>

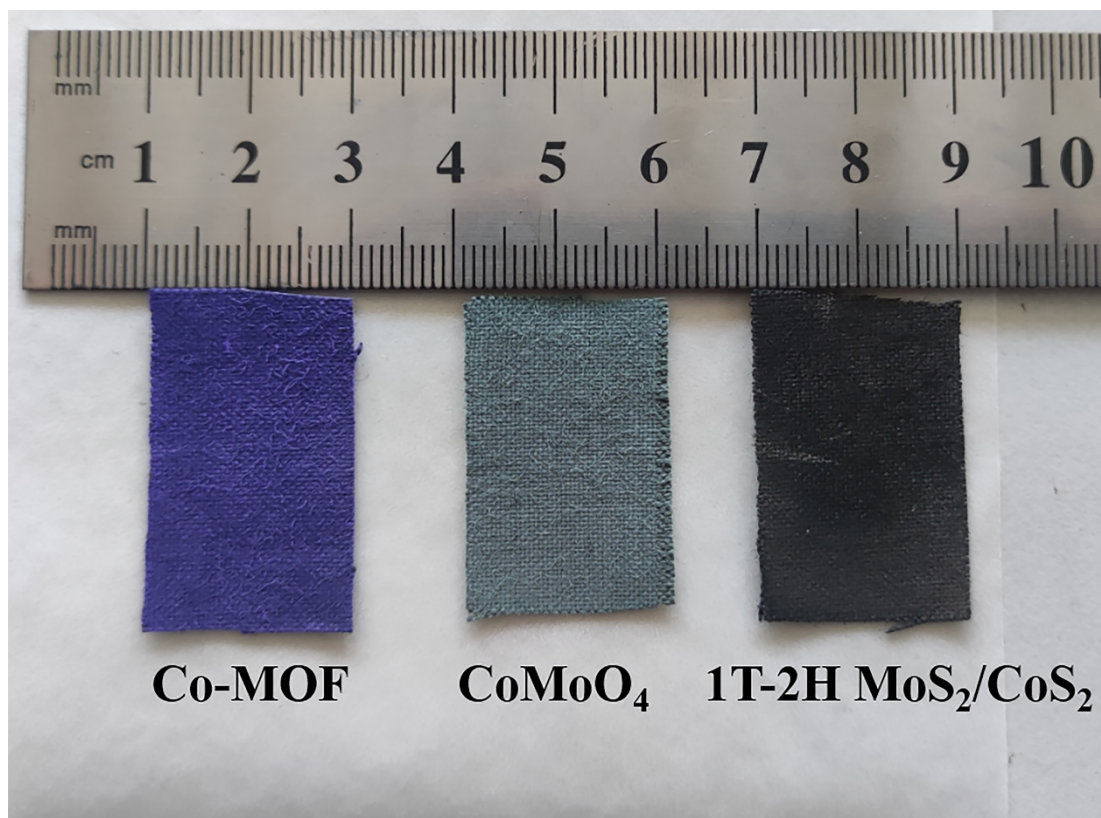

Fig. S1. Optical pictures of (from left to right) Co-MOF, CoMoO<sub>4</sub>, and 1T-2H MoS<sub>2</sub>/CoS<sub>2</sub>.

Co-MOF nanoarrays are grown directly on CC by the reaction of cobaltous nitrate hexahydrate with 2-methylimidazole in aqueous solution at room temperature. As shown in Fig. S2(a), the XRD results confirm the formation of Co-MOF precursor. Then, the obtained uniform Co-MOF nanoarrays reacted with sodium molybdate ( $\text{Na}_2\text{MoO}_4$ ) solution at  $100\text{ }^\circ\text{C}$  for 3 h *via* ion-exchange and the etching process to generate porous  $\text{CoMoO}_4$  nanoarrays according to:

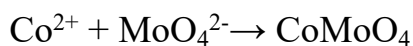

The corresponding XRD pattern [see Fig. S2(b)] is clearly attributed to the  $\text{CoMoO}_4$ .

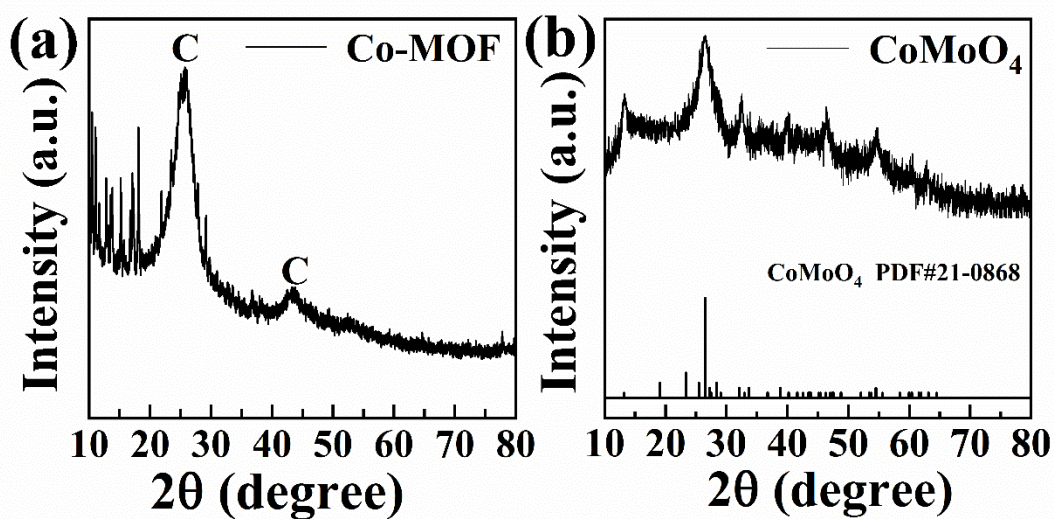

Fig. S2. XRD patterns of precursors Co-MOF (a) and  $\text{CoMoO}_4$  (b). The peak labeled C is attributed to the carbon cloth.

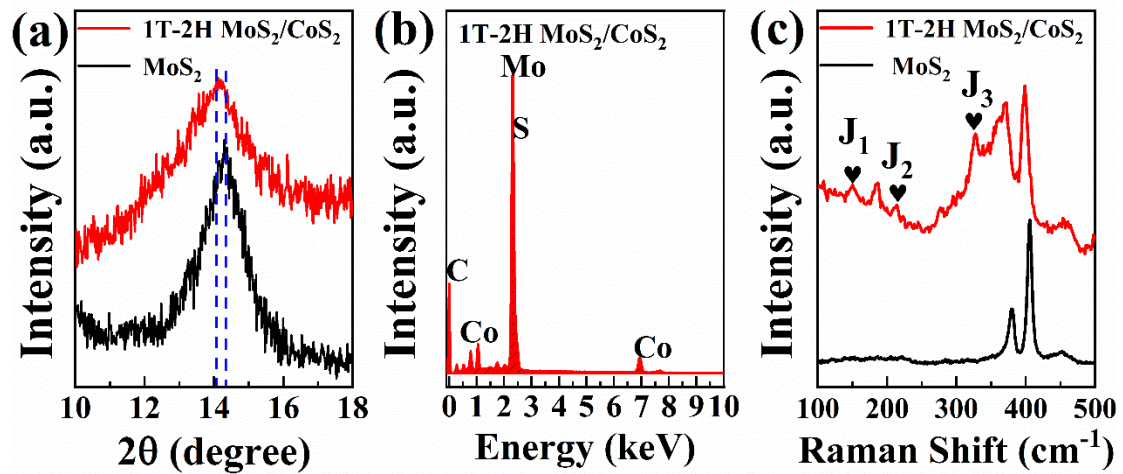

Fig. S3. (a) XRD patterns of 1T-2H MoS<sub>2</sub>/CoS<sub>2</sub> and pure MoS<sub>2</sub> from the selected range in Fig. 1(b). (b) EDS analysis of 1T-2H MoS<sub>2</sub>/CoS<sub>2</sub>. (c) Raman spectra of 1T-2H MoS<sub>2</sub>/CoS<sub>2</sub> and pure MoS<sub>2</sub>.

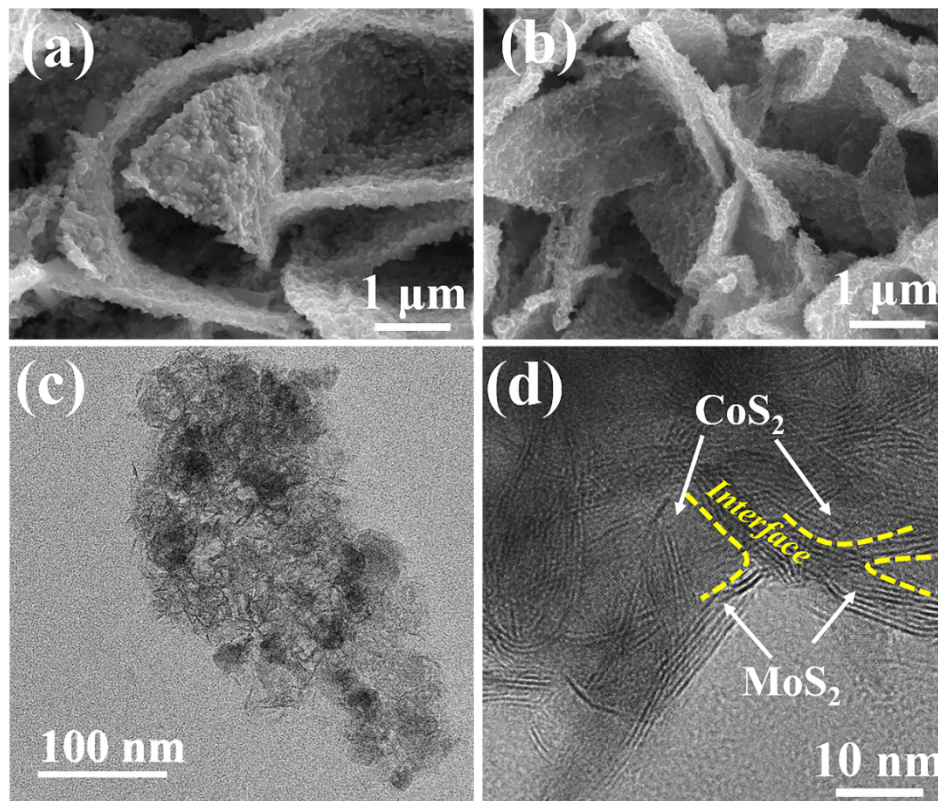

Fig. S4. SEM (a-b), TEM (c), and HRTEM (d) images of 1T-2H MoS<sub>2</sub>/CoS<sub>2</sub> heterostructure, where the yellow curves in (d) represent the interface.

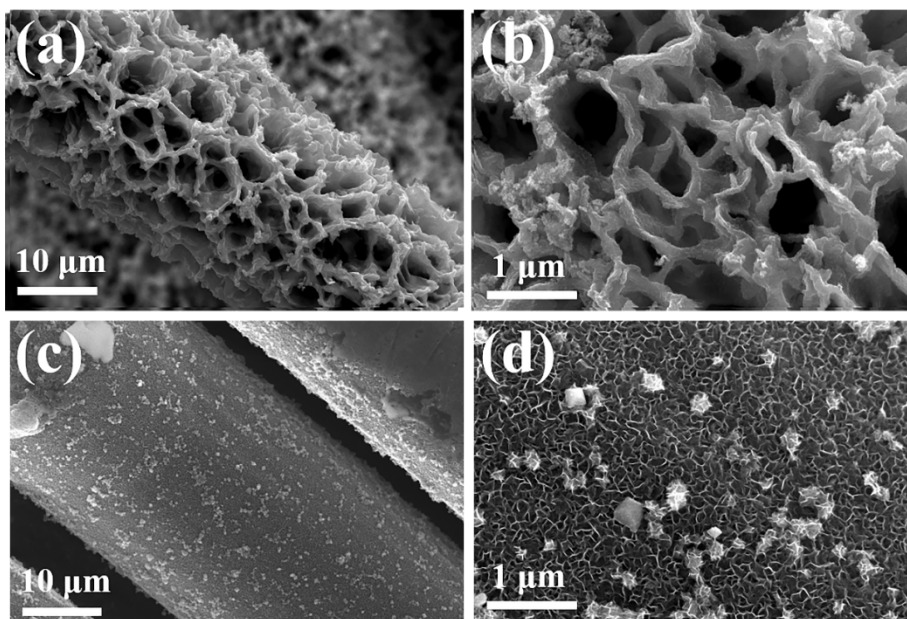

Fig. S5. SEM images of pure CoS<sub>2</sub> (a-b) and MoS<sub>2</sub> (c-d).

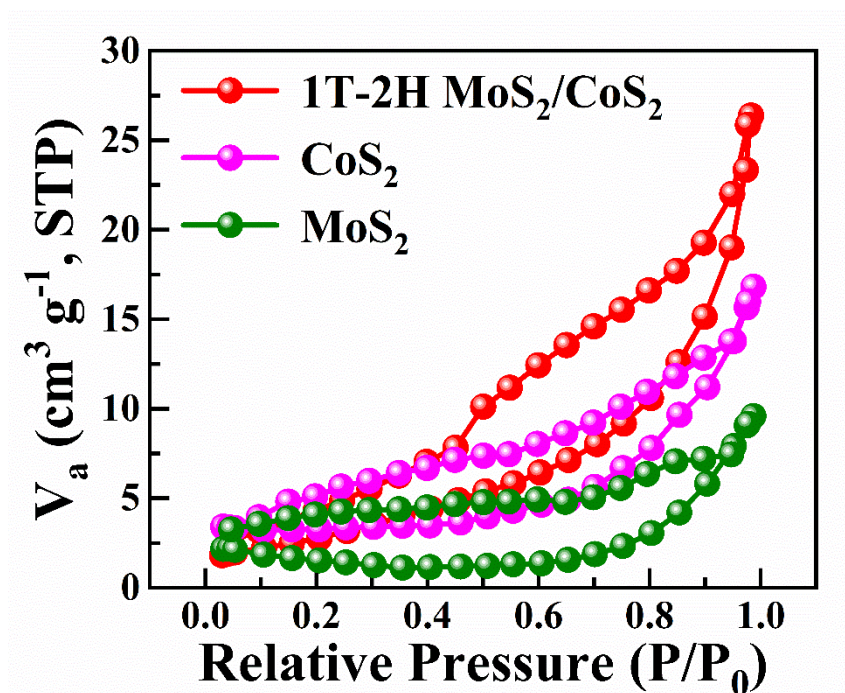

Fig. S6. The BET curves of specific surface area of CoS<sub>2</sub>, MoS<sub>2</sub> and 1T-2H MoS<sub>2</sub>/CoS<sub>2</sub> heterostructure.

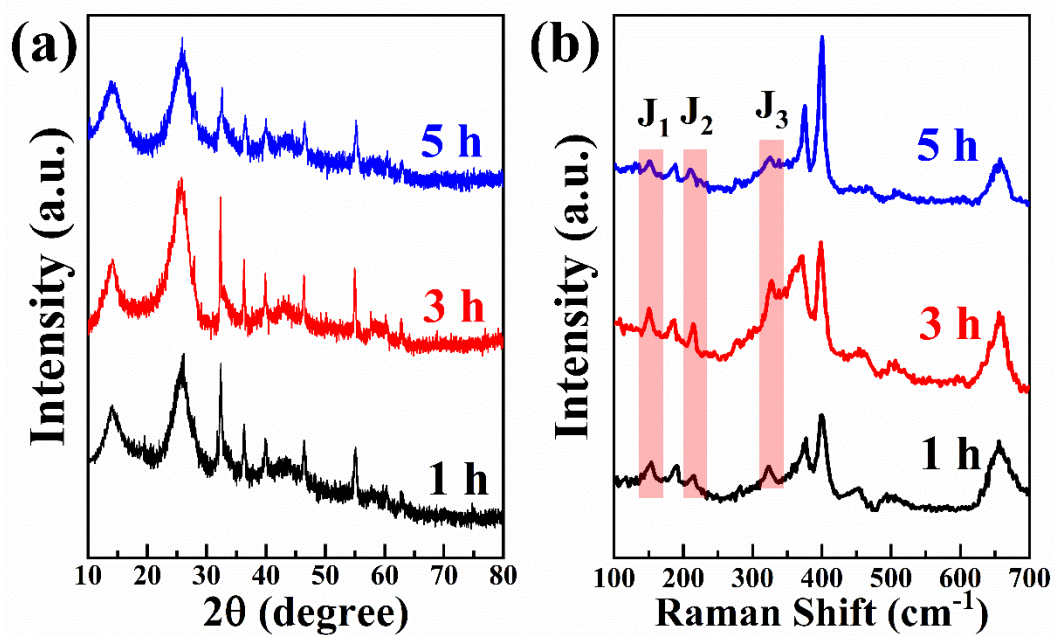

Fig. S7. XRD patterns (a) and Raman spectra (b) of  $\text{MoS}_2/\text{CoS}_2$ -1,  $\text{MoS}_2/\text{CoS}_2$ -3, and  $\text{MoS}_2/\text{CoS}_2$ -5 heterostructures.

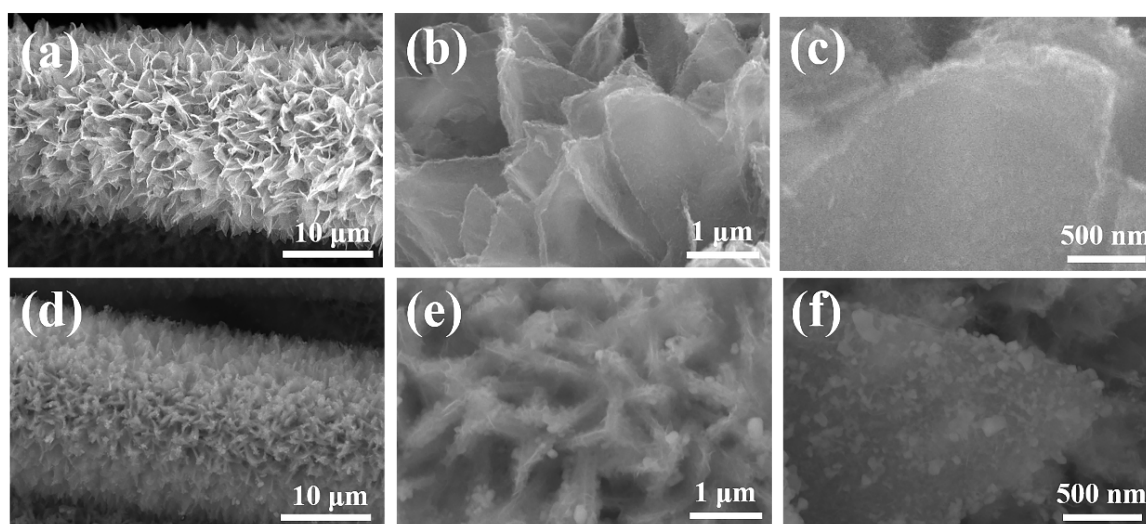

Fig. S8. SEM images of  $\text{MoS}_2/\text{CoS}_2$ -1 (a-c) and  $\text{MoS}_2/\text{CoS}_2$ -5 (d-f) heterostructures.



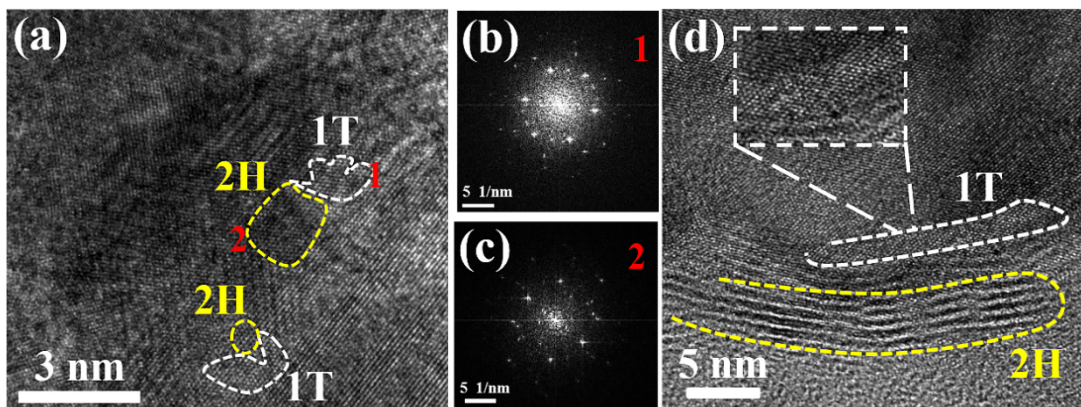

Fig. S9. (a, d) HRTEM images of 1T-2H MoS<sub>2</sub>/CoS<sub>2</sub>. (b, c) SAED images at positions 1 and 2 in (a), respectively.

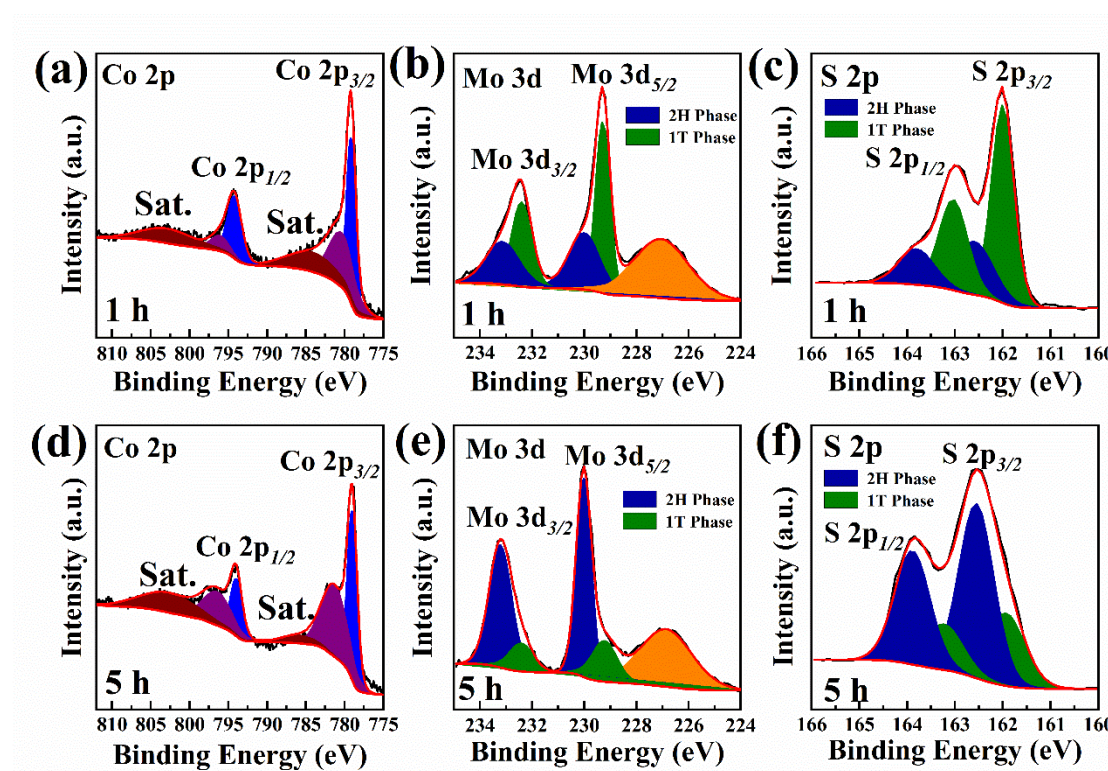

Fig. S10. XPS spectra of Co 2*p*, Mo 3*d*, and S 2*p* for MoS<sub>2</sub>/CoS<sub>2</sub>-1 (a-c) and MoS<sub>2</sub>/CoS<sub>2</sub>-5 (d-f), respectively.

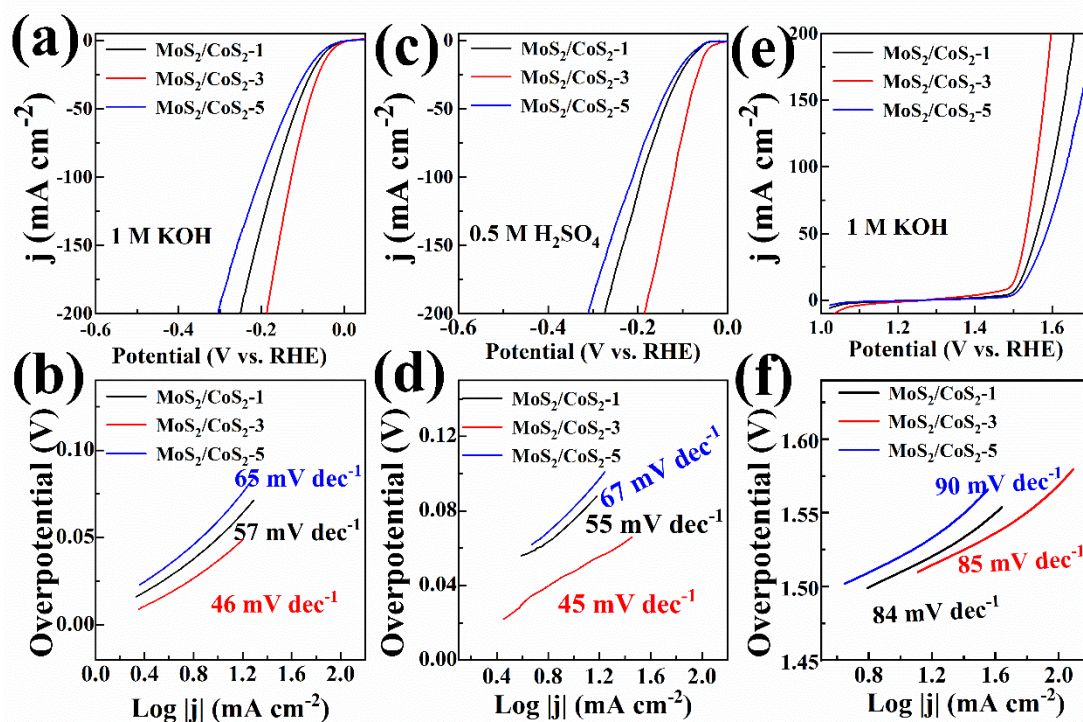

Fig. S11. HER polarization curves (a, c) and the corresponding Tafel slopes (b, d) for MoS<sub>2</sub>/CoS<sub>2</sub>-1, MoS<sub>2</sub>/CoS<sub>2</sub>-3 and MoS<sub>2</sub>/CoS<sub>2</sub>-5 in 1 M KOH and 0.5 M H<sub>2</sub>SO<sub>4</sub>. (e, f) OER polarization curves and the corresponding Tafel slopes of MoS<sub>2</sub>/CoS<sub>2</sub>-1, MoS<sub>2</sub>/CoS<sub>2</sub>-3 and MoS<sub>2</sub>/CoS<sub>2</sub>-5 in 1 M KOH.

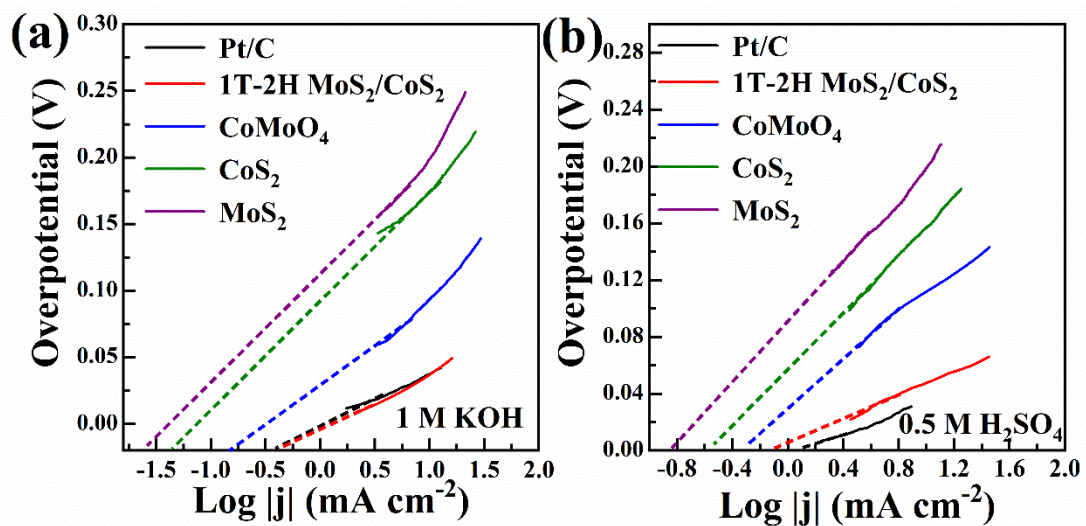

Fig. S12. Calculation of the exchange current densities of Pt/C, 1T-2H MoS<sub>2</sub>/CoS<sub>2</sub>, CoMoO<sub>4</sub>, CoS<sub>2</sub>, and MoS<sub>2</sub> in 1 M KOH (a) and 0.5 M H<sub>2</sub>SO<sub>4</sub> (b).

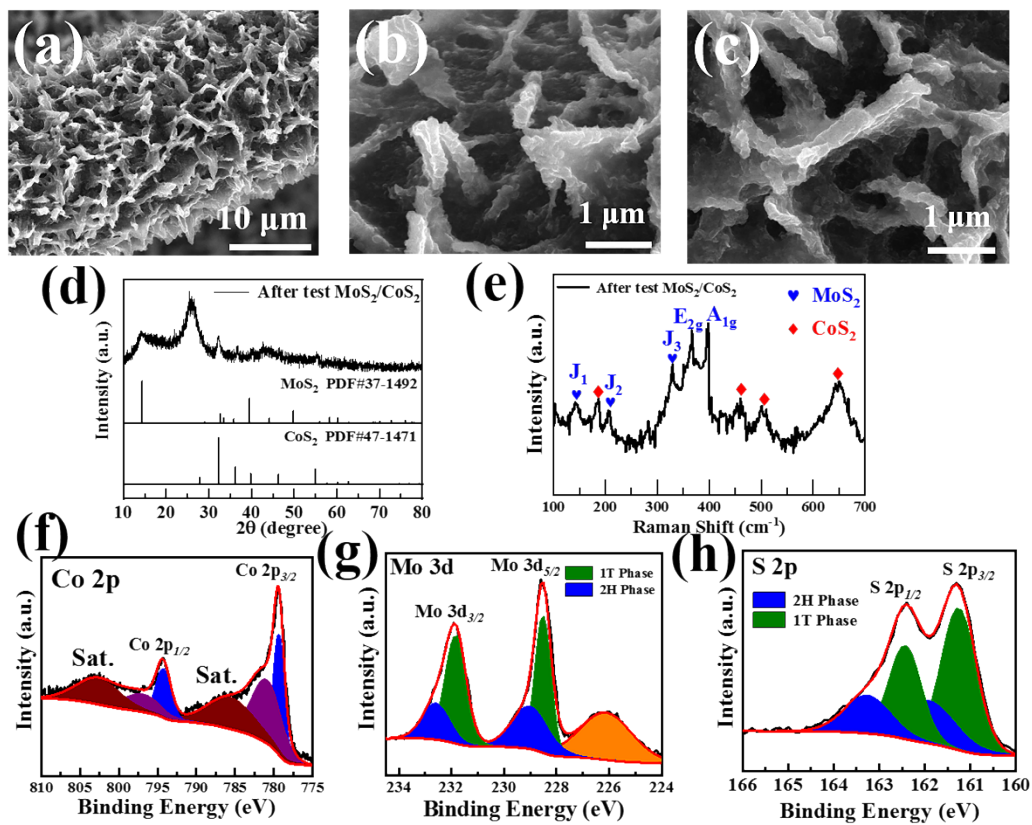

Fig. S13. SEM images (a-c), XRD pattern (d), Raman spectrum (e), and XPS spectra (f-h) of 1T-2H MoS<sub>2</sub>/CoS<sub>2</sub> after chronoamperometry test.

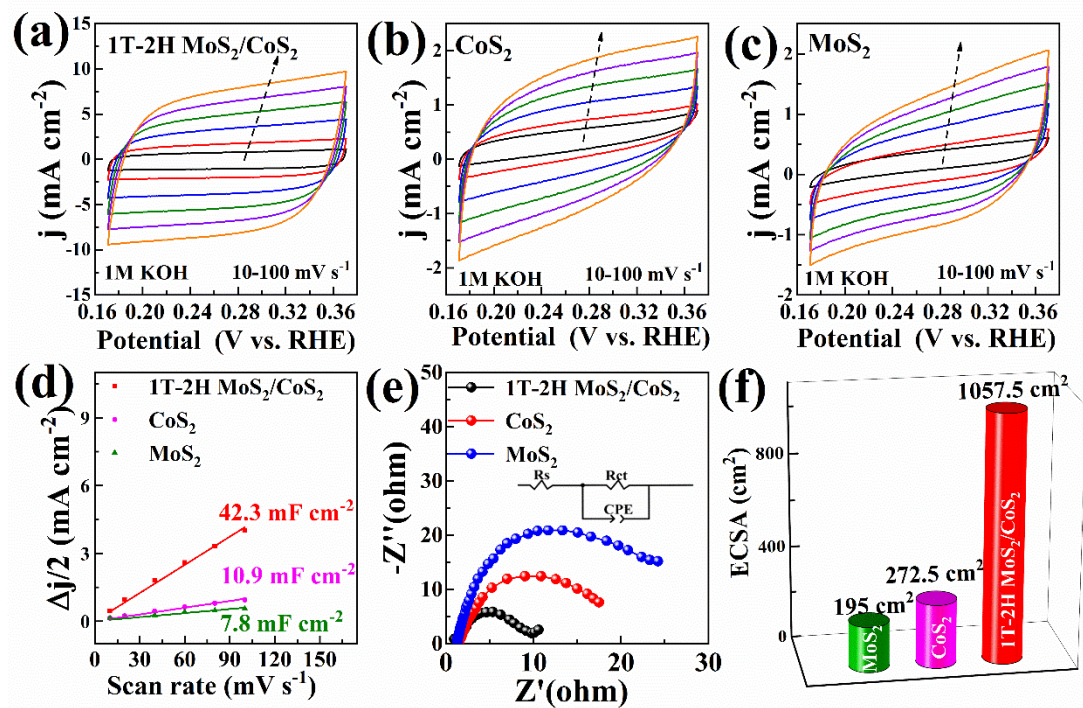

Fig. S14. CV curves in double layer region (0.17-0.37 V vs. RHE) (a-c), electrochemical double-layer capacitances (d), Nyquist plots (e), and electrochemical active surface area (f) for 1T-2H MoS<sub>2</sub>/CoS<sub>2</sub>, CoS<sub>2</sub>, and MoS<sub>2</sub> at different scan rates (10~100 mV s<sup>-1</sup>), respectively. All tests were performed in 1 M KOH.

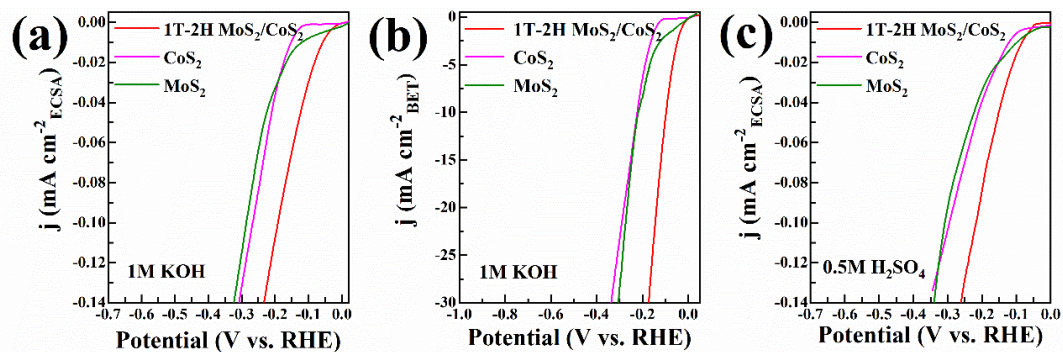

Fig. S15. Specific activities of 1T-2H MoS<sub>2</sub>/CoS<sub>2</sub>, CoS<sub>2</sub>, and MoS<sub>2</sub> in 1 M KOH normalized by ECSA (a) and BET surface area (b), respectively. (c) Specific activities of 1T-2H MoS<sub>2</sub>/CoS<sub>2</sub>, CoS<sub>2</sub>, and MoS<sub>2</sub> at 0.5 M H<sub>2</sub>SO<sub>4</sub> normalized by ECSA.

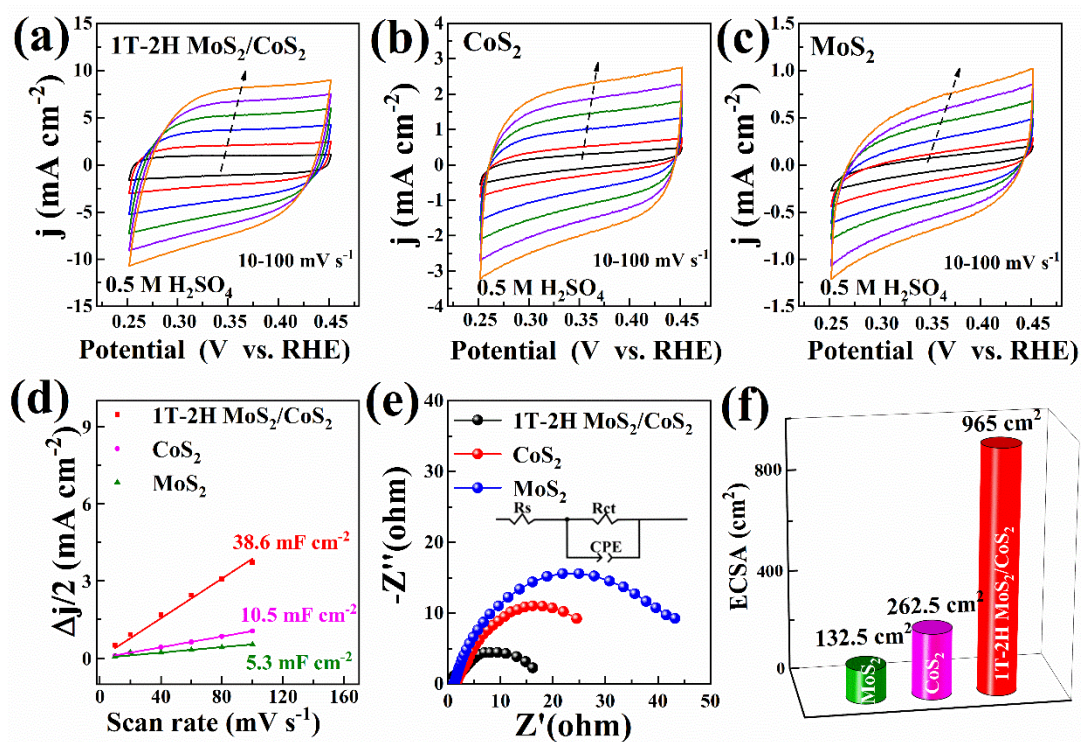

Fig. S16. CV curves in double layer region (0.25-0.45 V vs. RHE) (a-c), electrochemical double-layer capacitances (d), Nyquist plots (e), and electrochemical active surface area (f) for 1T-2H MoS<sub>2</sub>/CoS<sub>2</sub>, CoS<sub>2</sub>, and MoS<sub>2</sub> at different scan rates (10~100 mV s<sup>-1</sup>), respectively. All tests were performed in 0.5 M H<sub>2</sub>SO<sub>4</sub>.

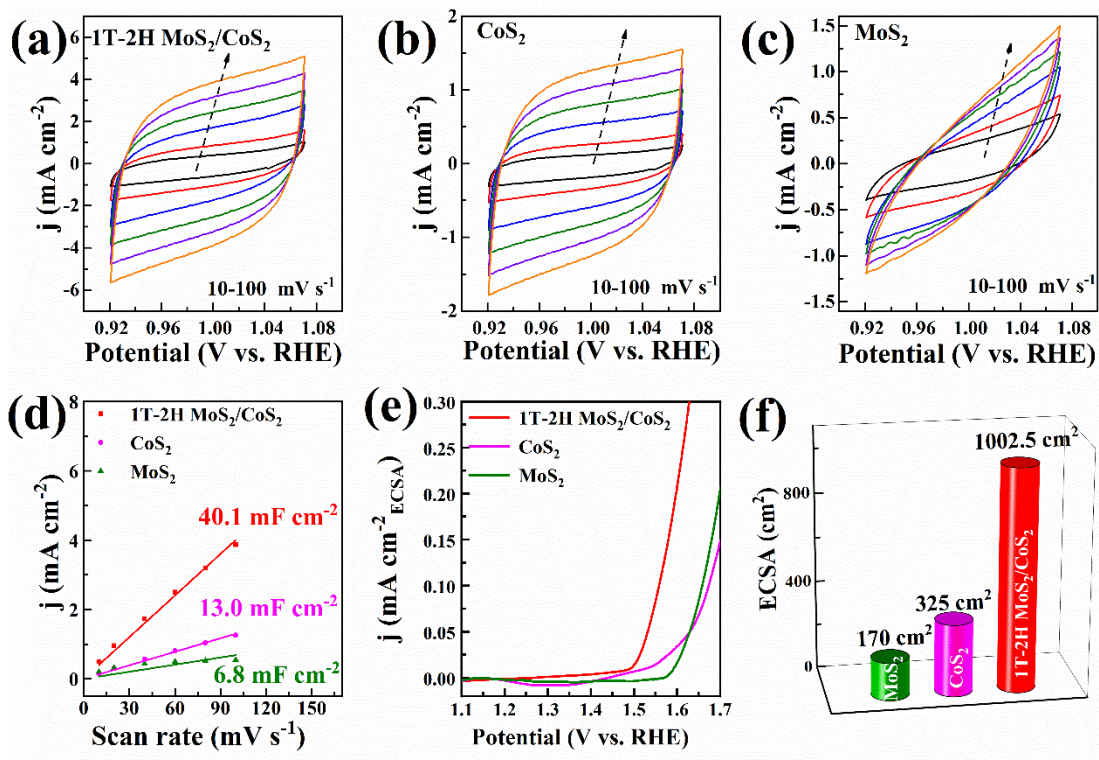

Fig. S17. CV curves in double layer region (0.92-1.07 V vs. RHE) (a-c), electrochemical double-layer capacitances (d), specific activities normalized by ECSA (e), and electrochemical active surface areas (f) for 1T-2H MoS<sub>2</sub>/CoS<sub>2</sub>, CoS<sub>2</sub>, and MoS<sub>2</sub> at different scan rates (10~100 mV s<sup>-1</sup>), respectively. All tests were performed in 1 M KOH.



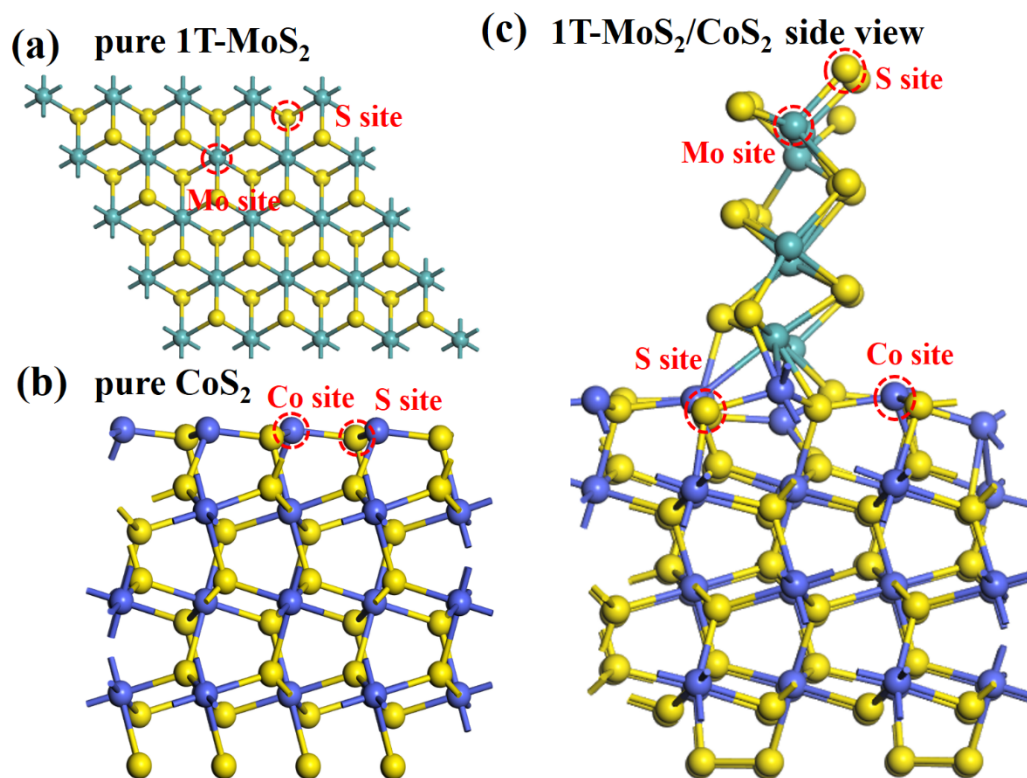

Fig. S18. The H adsorption configurations. (a) The adsorption on Mo and S sites for 1T-MoS<sub>2</sub>. (b) The adsorption on Co and S sites for CoS<sub>2</sub>(100). The adsorption on Mo, Co and S sites for 1T-MoS<sub>2</sub>/CoS<sub>2</sub> heterostructure (c). The cyan, yellow, and light blue balls represent Mo, S, and Co atoms, respectively.

Table S1. The performance of various catalysts for HER in 1 M KOH.

|                                             | Loading<br>(mg cm <sup>-2</sup> ) | $\eta_{10}$<br>(mV) | Tafel slope<br>(mV dec <sup>-1</sup> ) | Exchange current<br>$j_0$<br>(mA cm <sup>-2</sup> ) | TOF value at 150<br>mV overpotential<br>(s <sup>-1</sup> per site) |
|---------------------------------------------|-----------------------------------|---------------------|----------------------------------------|-----------------------------------------------------|--------------------------------------------------------------------|
| Pt/C                                        | 2.01                              | 40                  | 37                                     | 1.31                                                | 0.091                                                              |
| 1T-2H<br>MoS <sub>2</sub> /CoS <sub>2</sub> | 2.03                              | 37                  | 46                                     | 1.30                                                | 0.070                                                              |
| CoMoO <sub>4</sub>                          | 1.97                              | 94                  | 78                                     | 0.75                                                | 0.019                                                              |
| CoS <sub>2</sub>                            | 2.05                              | 175                 | 90                                     | 0.25                                                | 0.003                                                              |
| MoS <sub>2</sub>                            | 2.11                              | 200                 | 108                                    | 0.18                                                | 0.002                                                              |

Table S2. Comparison of HER performance of 1T-2H MoS<sub>2</sub>/CoS<sub>2</sub> with other non-noble metal electrocatalysts in 1 M KOH.

| Catalyst                                                                         | $\eta_{10}$ (mV) | Tafel slope<br>(mV dec <sup>-1</sup> ) | Reference        |
|----------------------------------------------------------------------------------|------------------|----------------------------------------|------------------|
| 1T-2H MoS <sub>2</sub> /CoS <sub>2</sub>                                         | 37               | 46                                     | <b>This work</b> |
| MoS <sub>2</sub> -CoS <sub>2</sub> HANs/Ti                                       | 82               | 59                                     | 3                |
| Co <sub>3</sub> O <sub>4</sub> /MoS <sub>2</sub>                                 | 205              | 98                                     | 4                |
| CoS <sub>1.097</sub> /MoS <sub>2</sub>                                           | 249              | 75                                     | 5                |
| Mo-Co <sub>9</sub> S <sub>8</sub> @C                                             | 113              | 67                                     | 6                |
| 1T-MoS <sub>2</sub> /CoS <sub>2</sub>                                            | 71               | 60                                     | 7                |
| Ni-MoS <sub>2</sub>                                                              | 98               | 60                                     | 8                |
| MoS <sub>2</sub> /CoS <sub>2</sub> NTs                                           | 85               | 34                                     | 9                |
| meso-FeMoS <sub>2</sub> /CoMo <sub>2</sub> S <sub>4</sub>                        | 122              | 90                                     | 10               |
| MoS <sub>2</sub> /Co <sub>9</sub> S <sub>8</sub> /Ni <sub>3</sub> S <sub>2</sub> | 113              | 85                                     | 11               |
| NiS-MoS <sub>2</sub> HNSAs/CC                                                    | 106              | 56                                     | 12               |
| NiS <sub>2</sub> /MoS <sub>2</sub> -CC                                           | 91               | 57                                     | 13               |
| MoS <sub>2</sub> /Ni <sub>3</sub> V <sub>2</sub> O <sub>8</sub>                  | 48               | 46                                     | 14               |
| MoS <sub>2</sub> /NiS <sub>2</sub>                                               | 68               | 50                                     | 15               |

Table S3. The performance of various catalysts for HER in 0.5 M H<sub>2</sub>SO<sub>4</sub>.

|                                             | $\eta_{10}$ (mV) | Tafel slope<br>(mV dec <sup>-1</sup> ) | Exchange current $j_0$<br>(mA cm <sup>-2</sup> ) | TOF value at 150 mV<br>overpotential<br>(s <sup>-1</sup> per site) |
|---------------------------------------------|------------------|----------------------------------------|--------------------------------------------------|--------------------------------------------------------------------|
| Pt/C                                        | 36               | 35                                     | 1.30                                             | 0.124                                                              |
| 1T-2H<br>MoS <sub>2</sub> /CoS <sub>2</sub> | 51               | 45                                     | 0.81                                             | 0.040                                                              |
| CoMoO <sub>4</sub>                          | 112              | 75                                     | 0.35                                             | 0.020                                                              |
| CoS <sub>2</sub>                            | 156              | 91                                     | 0.28                                             | 0.005                                                              |
| MoS <sub>2</sub>                            | 208              | 105                                    | 0.16                                             | 0.003                                                              |

Table S4. Comparison of HER performance of 1T-2H MoS<sub>2</sub>/CoS<sub>2</sub> with other non-noble metal electrocatalysts in 0.5 M H<sub>2</sub>SO<sub>4</sub>.

| Catalyst                                                                             | $\eta_{10}$ (mV) | Tafel slope<br>(mV dec <sup>-1</sup> ) | Reference        |
|--------------------------------------------------------------------------------------|------------------|----------------------------------------|------------------|
| 1T-2H MoS <sub>2</sub> /CoS <sub>2</sub>                                             | 51               | 45                                     | <b>This work</b> |
| CoS <sub>2</sub> @1T-MoS <sub>2</sub>                                                | 72               | 45                                     | 16               |
| 1T-MoS <sub>2</sub> /CoS <sub>2</sub>                                                | 26               | 43                                     | 7                |
| CoS <sub>1.097</sub> /MoS <sub>2</sub>                                               | 228              | 59                                     | 5                |
| 1T/2H MoS <sub>2</sub>                                                               | 131              | 106                                    | 17               |
| MoS <sub>2</sub> -CoS <sub>2</sub> @PCMT                                             | 200              | 95                                     | 18               |
| Mo-Co <sub>9</sub> S <sub>8</sub> @C                                                 | 98               | 34                                     | 6                |
| MoP/MoS <sub>2</sub> @CC                                                             | 69               | 61                                     | 19               |
| MoS <sub>2</sub> /Co <sub>9</sub> S <sub>8</sub> /Ni <sub>3</sub> S <sub>2</sub> /NF | 103              | 55                                     | 20               |
| CoP/NiCoP/NC                                                                         | 60               | 78                                     | 21               |
| MoNiCNTs                                                                             | 182              | 49                                     | 22               |

Table S5. The performance of various catalysts for OER and overall water splitting in 1 M KOH.

|                                          | $\eta_{10}$ (mV) | Tafel slope (mV dec <sup>-1</sup> ) | TOF value at 400 mV overpotential (s <sup>-1</sup> per site) | $\eta_{10}$ (V) cell voltage |
|------------------------------------------|------------------|-------------------------------------|--------------------------------------------------------------|------------------------------|
| IrO <sub>2</sub>                         | 233              | 82                                  | 0.063                                                        | 1.52                         |
| 1T-2H MoS <sub>2</sub> /CoS <sub>2</sub> | 261              | 85                                  | 0.080                                                        | 1.53                         |
| CoMoO <sub>4</sub>                       | 335              | 102                                 | 0.012                                                        | 1.67                         |
| CoS <sub>2</sub>                         | 363              | 123                                 | 0.006                                                        | 1.68                         |
| MoS <sub>2</sub>                         | 405              | 142                                 | 0.002                                                        | 1.76                         |

Table S6. Comparison of OER performance of 1T-2H MoS<sub>2</sub>/CoS<sub>2</sub> with other non-noble metal electrocatalysts in 1 M KOH.

| Catalyst                                                                         | $\eta_{10}$ (mV) | Tafel slope (mV dec <sup>-1</sup> ) | Reference        |
|----------------------------------------------------------------------------------|------------------|-------------------------------------|------------------|
| 1T-2H MoS <sub>2</sub> /CoS <sub>2</sub>                                         | 261              | 85                                  | <b>This work</b> |
| MoS <sub>2</sub> -CoS <sub>2</sub> HANs/Ti                                       | 266              | 104                                 | 3                |
| meso-FeMoS <sub>2</sub> /CoMo <sub>2</sub> S <sub>4</sub>                        | 290              | 65                                  | 10               |
| MoS <sub>2</sub> /Co <sub>9</sub> S <sub>8</sub> /Ni <sub>3</sub> S <sub>2</sub> | 166              | 58                                  | 11               |
| MoS <sub>2</sub> /NiCoS                                                          | 290              | 77                                  | 23               |
| MoS <sub>2</sub> /Ni <sub>3</sub> S <sub>2</sub>                                 | 278              | 91                                  | 24               |
| Co <sub>3</sub> O <sub>4</sub> /MoS <sub>2</sub>                                 | 230              | 45                                  | 4                |
| Co <sub>3</sub> S <sub>4</sub> @MoS <sub>2</sub>                                 | 280              | 43                                  | 25               |
| NiS-MoS <sub>2</sub> HNSAs/CC                                                    | 203              | 77                                  | 26               |
| NiS-Ni <sub>3</sub> S <sub>2</sub> /NF                                           | 269              | 119                                 | 27               |
| NiS <sub>2</sub> /MoS <sub>2</sub> -CC                                           | 362              | 117                                 | 13               |
| MoS <sub>2</sub> /NiS                                                            | 278              | 91                                  | 15               |

Table S7. Comparison of overall water splitting performance of 1T-2H MoS<sub>2</sub>/CoS<sub>2</sub> with other non-noble metal electrocatalysts in 1 M KOH.

| Catalyst                                                        | $\eta_{10}$ (V)<br>Cell voltage | Reference        |
|-----------------------------------------------------------------|---------------------------------|------------------|
| 1T-2H MoS <sub>2</sub> /CoS <sub>2</sub>                        | 1.53                            | <b>This work</b> |
| Mo-Co <sub>9</sub> S <sub>8</sub> @C                            | 1.56                            | 6                |
| NiS–MoS <sub>2</sub> HNSAs/CC                                   | 1.54                            | 26               |
| MoS <sub>2</sub> /Ni <sub>3</sub> V <sub>2</sub> O <sub>8</sub> | 1.58                            | 14               |
| MoS <sub>2</sub> /NiS <sub>2</sub>                              | 1.59                            | 24               |
| N-CoS <sub>2</sub> /G                                           | 1.58                            | 28               |
| N-Ni <sub>3</sub> S <sub>2</sub> /CoS <sub>2</sub> /NF          | 1.56                            | 29               |
| MoS <sub>2</sub> /NiCoS                                         | 1.50                            | 23               |
| Ni <sub>2</sub> P-MoS <sub>2</sub> HNSAs/CC                     | 1.57                            | 30               |
| MoS <sub>2</sub> @CoNi-ZIF                                      | 1.55                            | 31               |

## References:

1. M. Gong, Y. Li, H. Wang, Y. Liang, J. Z. Wu, J. Zhou, J. Wang, T. Regier, F. Wei and H. Dai, *J. Am. Chem. Soc.*, 2013, **135**, 8452-8455.
2. J. Xu, J. Li, D. Xiong, B. Zhang, Y. Liu, K.-H. Wu, I. Amorim, W. Li and L. Liu, *Chem. Sci.*, 2018, **9**, 3470-3476.
3. Y. Li, W. Wang, B. Huang, Z. Mao, R. Wang, B. He, Y. Gong and H. Wang, *J. Energy Chem.*, 2021, **57**, 99-108.
4. A. Muthurasu, V. Maruthapandian and H. Y. Kim, *Appl. Catal. B*, 2019, **248**, 202-210.
5. J. Sun, Z. Huang, T. Huang, X. Wang, X. Wang, P. Yu, C. Zong, F. Dai and D. Sun, *ACS Appl. Energy Mater.*, 2019, **2**, 7504-7511.
6. L. Wang, X. Duan, X. Liu, J. Gu, R. Si, Y. Qiu, Y. Qiu, D. Shi, F. Chen and X. Sun, *Adv. Energy Mater.*, 2020, **10**, 1903137.
7. Y. Feng, T. Zhang, J. Zhang, H. Fan, C. He and J. Song, *Small*, 2020, **16**, 2002850.
8. C. Lei, Y. Wang, Y. Hou, P. Liu, J. Yang, T. Zhang, X. Zhuang, M. Chen, B. Yang and L. Lei, *Energy Environ. Sci.*, 2019, **12**, 149-156.
9. B. Tang, Z. G. Yu, Y. Zhang, C. Tang, H. L. Seng, Z. W. Seh, Y.-W. Zhang, S. J. Pennycook, H. Gong and W. Yang, *J. Mater. Chem. A*, 2019, **7**, 13339-13346.
10. Y. Guo, J. Tang, J. Henzie, B. Jiang, W. Xia, T. Chen, Y. Bando, Y.-M. Kang, M. S. A. Hossain and Y. Sugahara, *ACS Nano*, 2020, **14**, 4141-4152.
11. Y. Yang, H. Yao, Z. Yu, S. M. Islam, H. He, M. Yuan, Y. Yue, K. Xu, W. Hao, G. Sun, H. Li, S. Ma, P. Zapol and M. G. Kanatzidis, *J. Am. Chem. Soc.*, 2019, **141**, 10417-10430.
12. S. Guan, X. Fu, Z. Lao, C. Jin and Z. Peng, *Sustain. Energy Fuels*, 2019, **3**, 2056-2066.
13. X. Wang, L. Li, Z. Wang, L. Tan, Z. Wu, Z. Liu, S. Gai and P. Yang, *Electrochim. Acta*, 2019, **326**, 134983.
14. P. Chang, S. Zhang, X. Xu, Y. Lin, X. Chen, L. Guan and J. Tao, *Chem. Eng. J.*, 2021, **423**, 130196.
15. S. Ye, F. Luo, Q. Zhang, P. Zhang, T. Xu, Q. Wang, D. He, L. Guo, Y. Zhang, C. He, X. Ouyang, M. Gu, J. Liu and X. Sun, *Energy Environ. Sci.*, 2019, **12**, 1000-1007.
16. Z. Liu, K. Wang, Y. Li, S. Yuan, G. Huang, X. Li and N. Li, *Appl. Catal. B*, 2022, **300**, 120696.
17. K. Le, X. Zhang, Q. Zhao, Y. Liu, P. Yi, S. Xu and W. Liu, *ACS Appl. Mater. Interface.*, 2021, **13**, 44427-44439.
18. M. Liu, H. N. Jaiswal, S. Shahi, S. Wei, Y. Fu, C. Chang, A. Chakravarty, X. Liu, C. Yang, Y. Liu, Y. H. Lee, V. Perebeinos, F. Yao and H. Li, *ACS Nano*, 2021, **15**, 5762-5772.
19. A. Wu, Y. Gu, Y. Xie, C. Tian, H. Yan, D. Wang, X. Zhang, Z. Cai and H. Fu, *ACS Appl. Mater. Interface.*, 2019, **11**, 25986-25995.
20. Y. Yang, H. Yao, Z. Yu, S. M. Islam, H. He, M. Yuan, Y. Yue, K. Xu, W. Hao

- and G. Sun, *J. Am. Chem. Soc.*, 2019, **141**, 10417-10430.
21. R. Boppella, J. Tan, W. Yang and J. Moon, *Adv. Funct. Mater.*, 2019, **29**, 1807976.
  22. X. Zhang and P. Yang, *Carbon*, 2021, **175**, 176-186.
  23. C. Qin, A. Fan, X. Zhang, S. Wang, X. Yuan and X. Dai, *J. Mater. Chem. A*, 2019, **7**, 27594-27602.
  24. J. Lin, P. Wang, H. Wang, C. Li, X. Si, J. Qi, J. Cao, Z. Zhong, W. Fei and J. Feng, *Adv. Sci.*, 2019, **6**, 1900246.
  25. Y. Guo, J. Tang, Z. Wang, Y.-M. Kang, Y. Bando and Y. Yamauchi, *Nano Energy*, 2018, **47**, 494-502.
  26. S. Guan, X. Fu, Z. Lao, C. Jin and Z. Peng, *Sustain. Energy Fuels*, 2019, **3**, 2056-2066.
  27. J. Wang and H. C. Zeng, *ACS Appl. Mater. Interface.*, 2019, **11**, 23180-23191.
  28. Y. Tong, Q. Sun, P. Chen, L. Chen, Z. Fei and P. J. Dyson, *ChemSusChem*, 2020, **13**, 5112-5118.
  29. Q. Kong, N. Fan, S. Chen, X. Wu, L. Liu, R. Lang, Z. Gao, H. Guan, C. Dong and G. Chen, *J. Electroanal. Chem.*, 2021, **895**, 115516.
  30. B. Zhang, K. Xu, X. Fu, S. Guan, X. Li and Z. Peng, *J. Alloy. Compd.*, 2021, **856**, 158094.
  31. Y. Liu, B. Hu, S. Wu, M. Wang, Z. Zhang, B. Cui, L. He and M. Du, *Appl. Catal. B*, 2019, **258**, 117970.
